# Supplementary material
Source: PubMed Central journal article supplement (PMC3563889)

**Appendix 1 (as supplied by the authors): Anterior–posterior radiograph of the hand showing severe carpometacarpal osteoarthritis (arrow) with subchondral sclerosis, joint space narrowing, osteophyte formation, involvement of the scaphotrapezial joint and a “zigzag” deformity of the thumb**

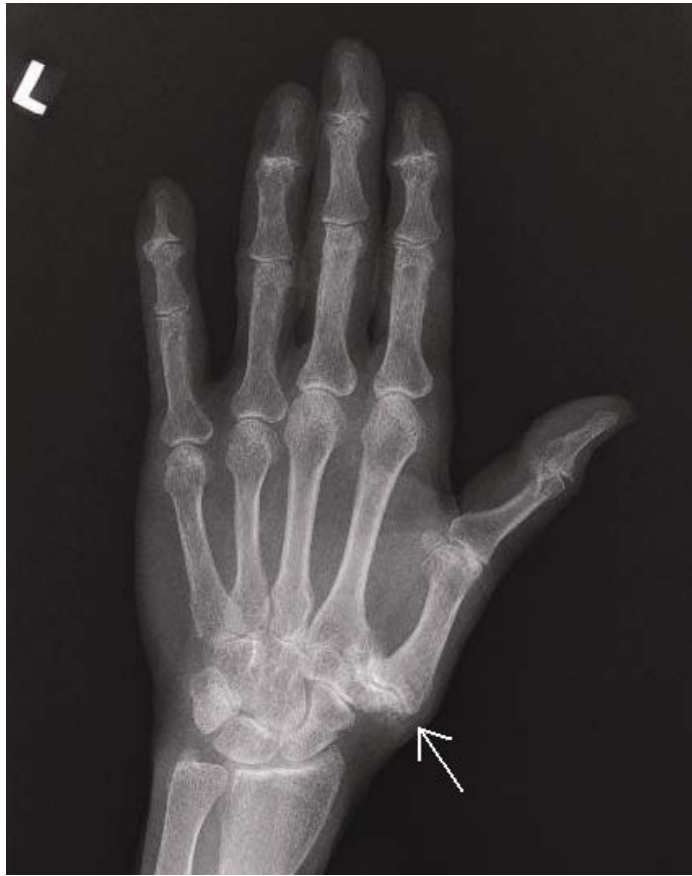

Supplement: supp_111444_five-thumb-1-at.pdf [file supp_111444_five-thumb-1-at.pdf]
